# Supplementary material for: Molecular Detection of Integrons, Colistin and β-lactamase Resistant Genes in Salmonella enterica Serovars Enteritidis and Typhimurium Isolated from Chickens and Rats Inhabiting Poultry Farms
Source: MDPI journal article supplement (doi:10.3390/microorganisms10020313), 2022-01-28
Supplement: s1 [file s1]

## Supplementary Materials

### Molecular detection of integrons, colistin and $\beta$ -lactamase resistant genes in *Salmonella enterica* serovars Enteritidis and Typhimurium isolated from chickens and rats inhabiting poultry farms

Tsepo Ramatla <sup>1,2,\*</sup>, Kealeboga Mileng <sup>1</sup>, Rendani Ndou <sup>1</sup>, Nthabiseng Mphuti <sup>1</sup>,  
Michelo Syakalima <sup>1,3</sup>, Kgaugelo E. Lekota <sup>2</sup> and Oriel M.M. Thekiso <sup>2</sup>

<sup>1</sup> Department of Animal Health, School of Agriculture, North-West University, Private Bag X2046, Mmabatho 2735, South Africa; k.mileng@gmail.com (K.M.); Rendani.Ndou@nwu.ac.za (R.N.); nthabiseng.mphuthi@nwu.ac.za (N.M.); michsan65@gmail.com (M.S.)

<sup>2</sup> Unit for Environmental Sciences and Management, North-West University, Private Bag X6001, Potchefstroom 2531, South Africa; Lekota.Lekota@nwu.ac.za (K.E.L.); thekiso@gmail.com (O.M.M.T.)

<sup>3</sup> Department of Disease Control, School of Veterinary Medicine, University of Zambia, Lusaka P.O. Box 32379, Zambia

\* Correspondence: ra21205450@gmail.com; Tel.: +27-18-299-2521

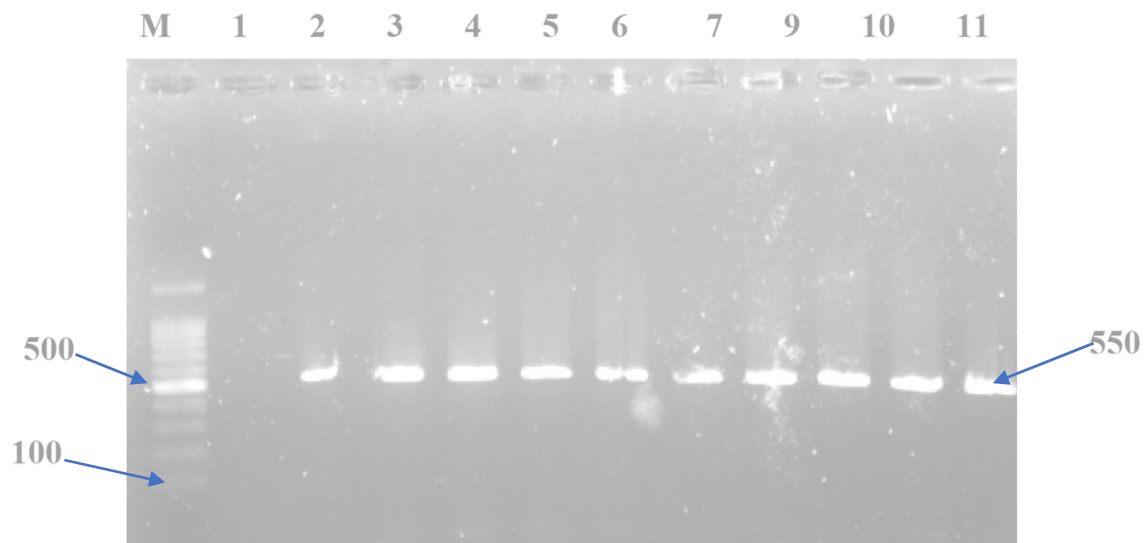

**Figure S1.** Representative agarose gel image of the *bla<sub>CTX-M</sub>* gene products. Lane M: 100bp DNA ladder; Lanes 2-11 positive gene fragments and Lane 1: negative control.

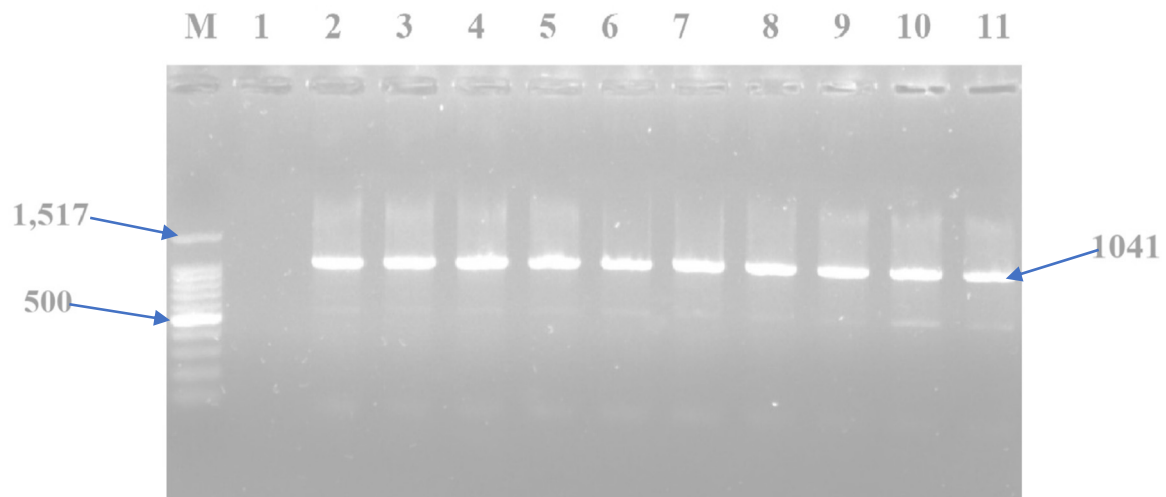

**Figure S2.** Representative agarose gel image of the *bla*<sub>CTX-M-1</sub> gene products. Lane M: 100bp DNA ladder; Lanes 2-11 positive gene fragments and Lane 1: negative control.

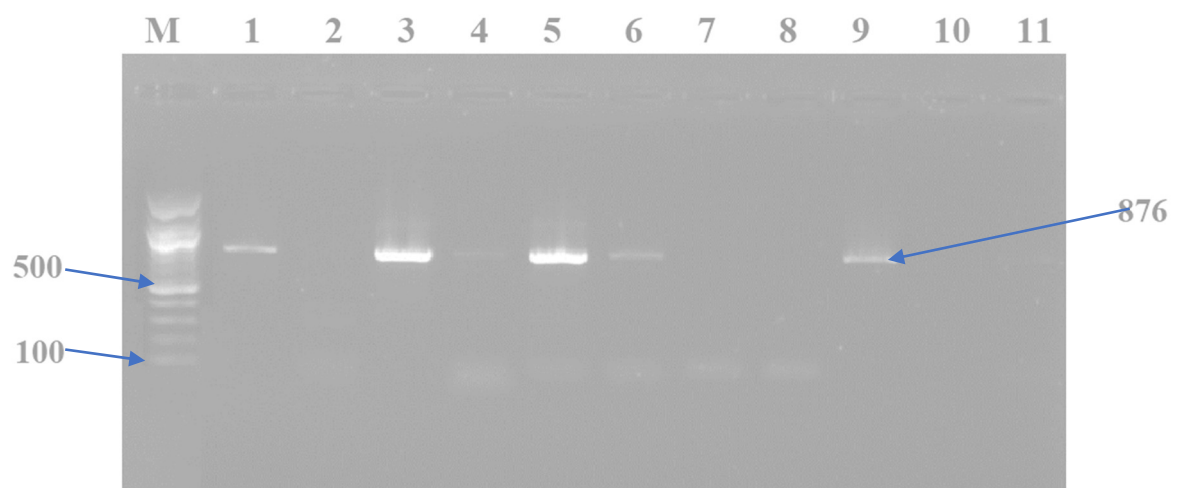

**Figure S3.** Representative agarose gel image of the *bla*<sub>CTX-M-2</sub> gene products. Lane M: 100bp DNA ladder; Lanes 1, 3-6, 9 positive gene fragments and Lane 11: negative control.

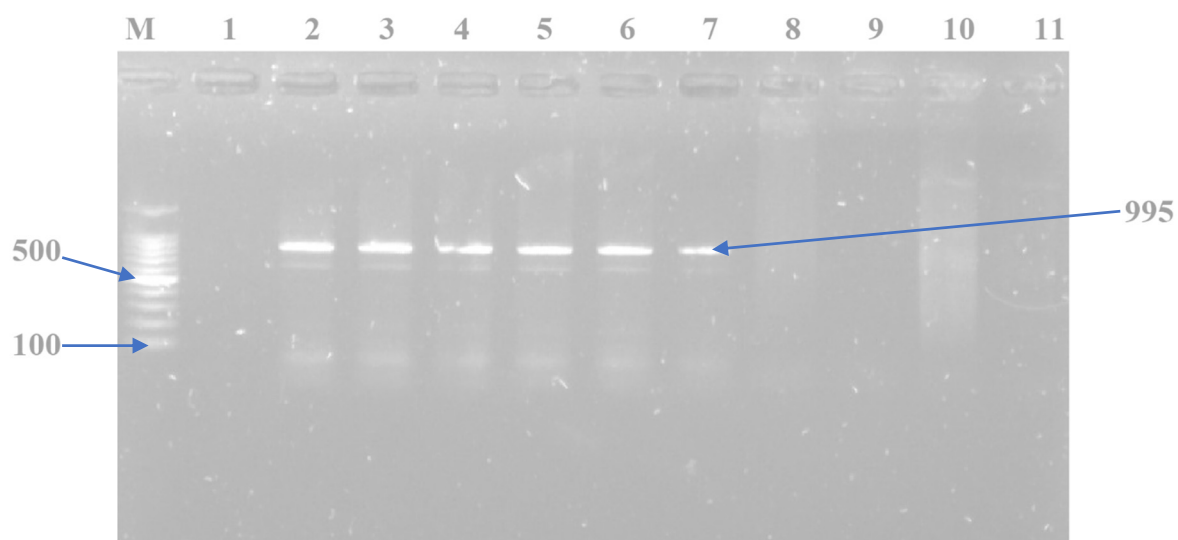

**Figure S4.** Representative agarose gel image of the *bla*<sub>CTX-M-15</sub> gene products. Lane M: 100bp DNA ladder; Lanes 2-17 positive gene fragments and Lane 1: negative control.

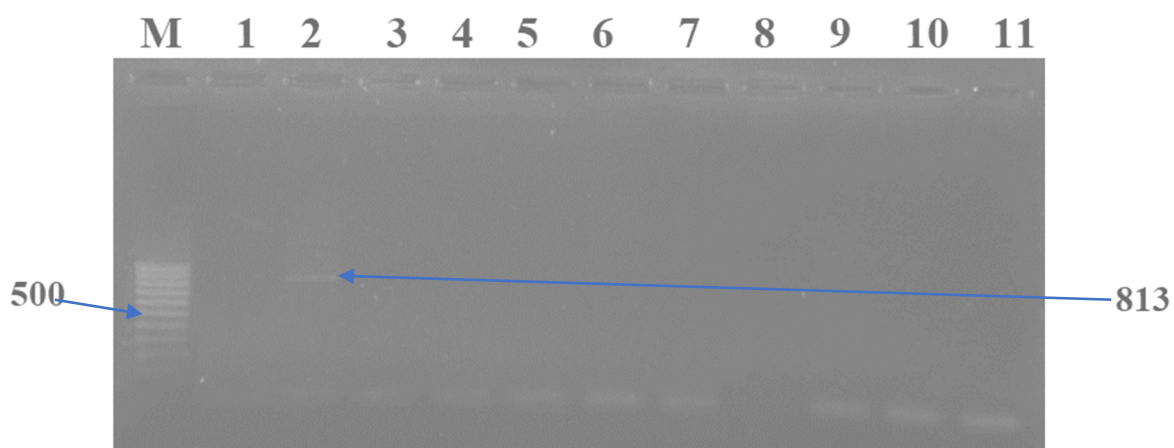

**Figure S5.** Representative agarose gel image of the *bla*<sub>OXA</sub> gene products. Lane M: 100bp DNA ladder; Lane 2 positive gene fragments and Lane 1: negative control.

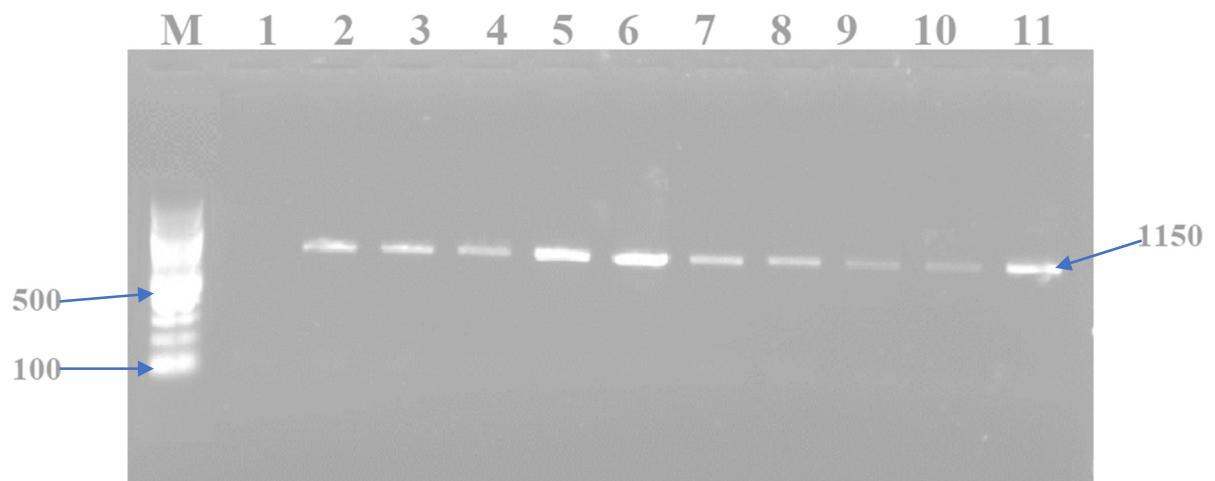

**Figure S6.** Representative agarose gel image of the *bla<sub>TEM</sub>* gene products. Lane M: 100bp DNA ladder; Lanes 2-11 positive gene fragments and Lane 1: negative control.

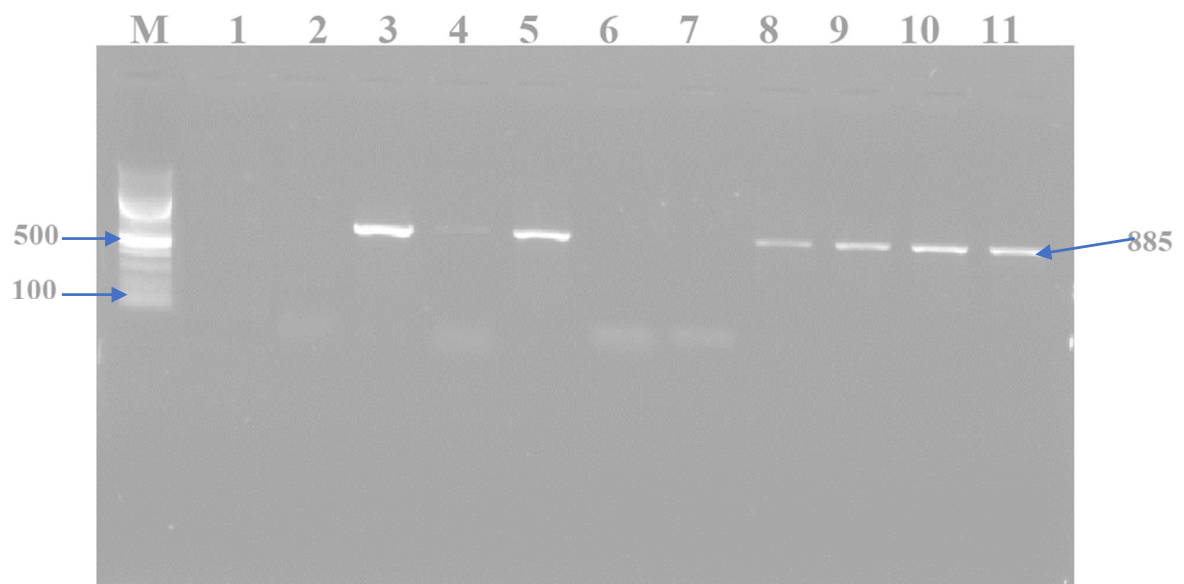

**Figure S7.** Representative agarose gel image of the *bla<sub>SHV</sub>* gene products. Lane M: 100bp DNA ladder; Lanes 3-5, 8-11 positive gene fragments and Lane 1: negative control.

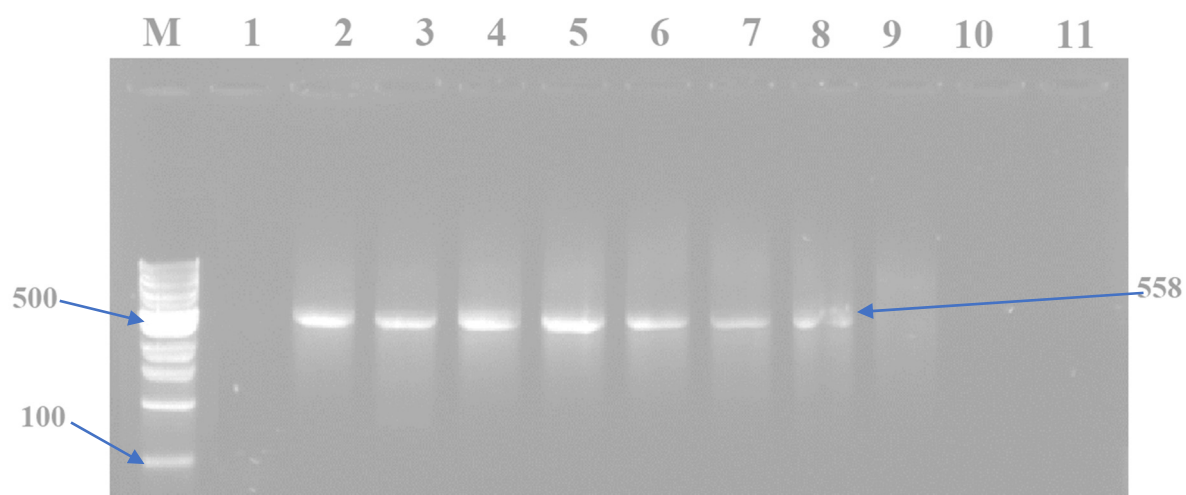

**Figure S8.** Representative agarose gel image of the *IntI1* gene products. Lane M: 100bp DNA ladder; Lanes 1-8 positive gene fragments and Lane 1: negative control.

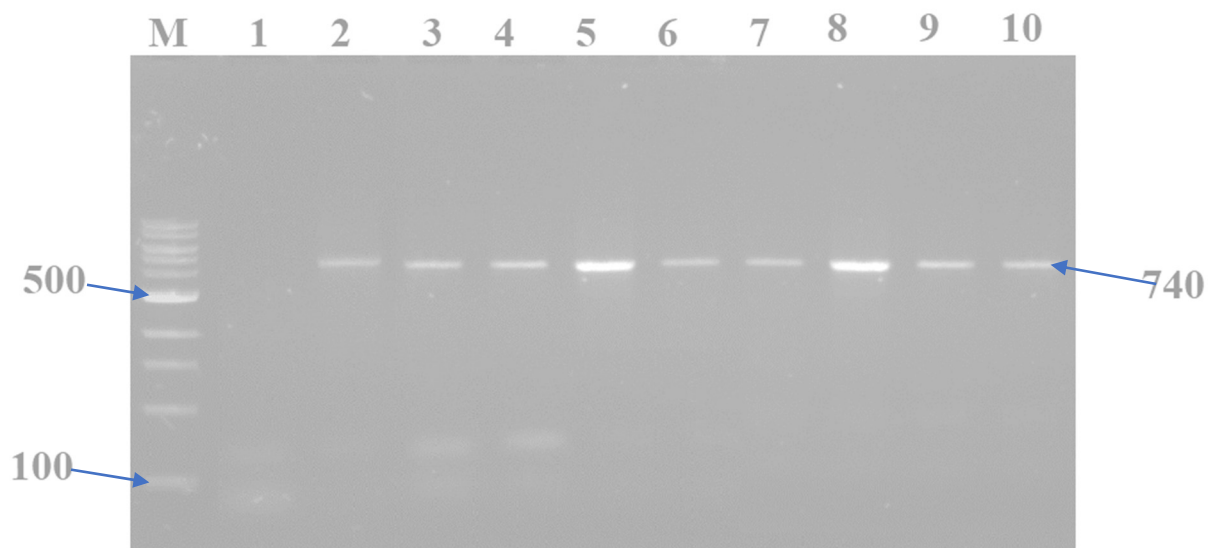

**Figure S9.** Representative agarose gel image of the *IntI2* gene products. Lane M: 100bp DNA ladder; Lanes 1-8 positive gene fragments and Lane 1: negative control.

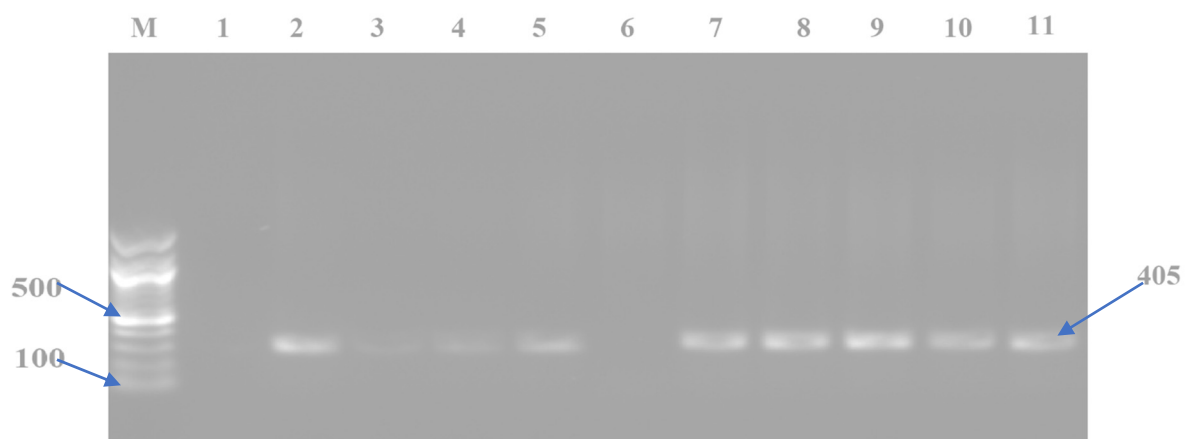

**Figure S10.** Representative agarose gel image of the *mcr-4* gene products. Lane M: 100bp DNA ladder; Lanes 1-8 positive gene fragments and Lane 1: negative control.
